# Supplementary material
Source: Springer Nature journal article supplement (https://www.springermedizin.de/resource/supplementary/13041_2011_124_MOESM4_ESM.pdf/25657566)

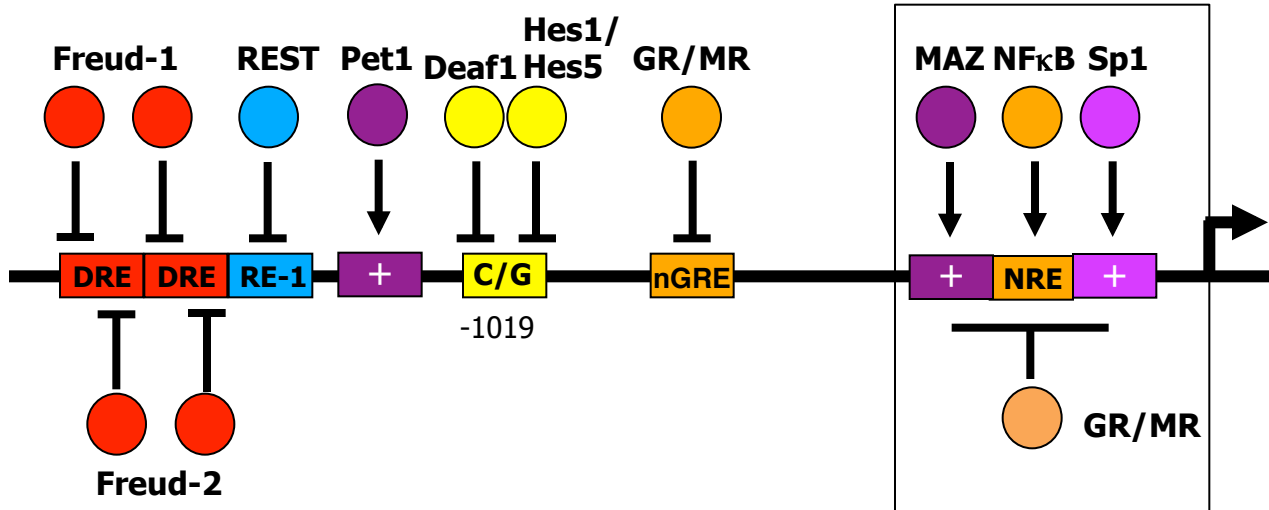

Supplement: MOESM4 [file 25657566]
